# Supplementary material
Source: PubMed Central journal article supplement (PMC5244309)
Supplement: AEM.02952-16_zam999117637s1.pdf [file AEM.02952-16_zam999117637s1.pdf]

## SUPPLEMENTARY MATERIAL

### **The acceptor side of photosystem II is the initial target of nitrite stress in *Synechocystis* sp. PCC 6803**

Xin Zhang,<sup>a,b</sup> Fei Ma,<sup>a,b</sup> Xi Zhu,<sup>a,b</sup> Junying Zhu,<sup>c</sup> Junfeng Rong,<sup>c</sup> Jiao Zhan,<sup>a</sup> Hui Chen,<sup>a</sup> Chenliu He,<sup>a</sup> Qiang Wang<sup>a</sup>

Key Laboratory of Algal Biology, Institute of Hydrobiology, Chinese Academy of Sciences, Wuhan 430072, Hubei, China<sup>a</sup>; University of Chinese Academy of Sciences, Beijing 100094, China<sup>b</sup>; SINOPEC Research Institute of Petroleum Processing, Beijing, China<sup>c</sup>

Address correspondence to Qiang Wang, [wangqiang@ihb.ac.cn](mailto:wangqiang@ihb.ac.cn).

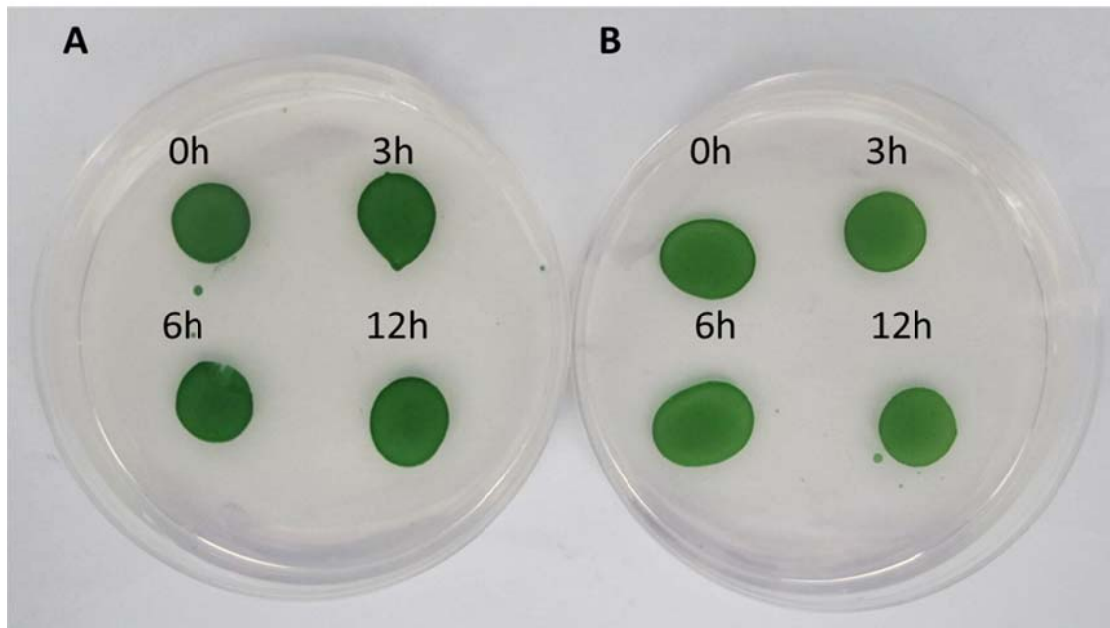

**Figure S1.** Effect of NO<sub>2</sub><sup>-</sup> on the viability of *Synechocystis* cells. Cells were incubated with BG11 (A) and 70.4mM (4×) NO<sub>2</sub><sup>-</sup> (B) and at various times aliquots were taken and centrifuged; then the cultures were concentrated to OD730 1.0 and equal volumes were loaded onto agar plates containing BG11 medium. The photo was taken after 4 days incubation under growth conditions.

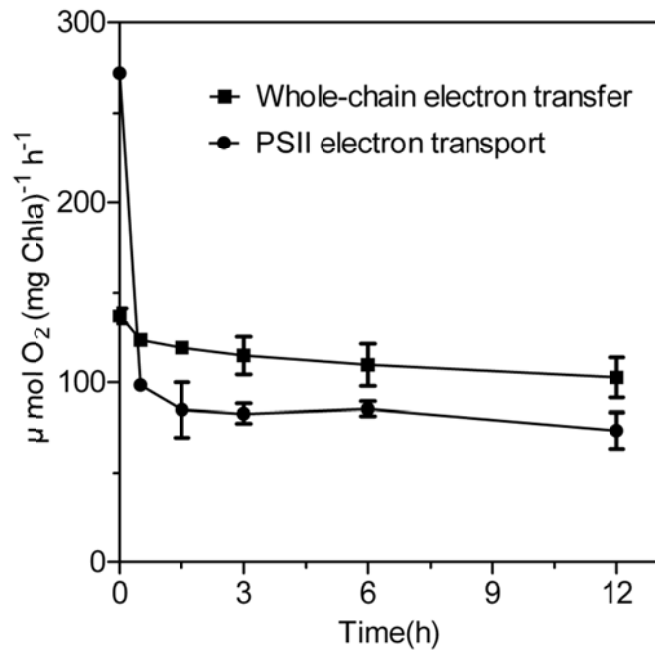

**Figure S2.** The absolute value changes of light-saturated whole-chain (intact square) and PSII-mediated (intact circle) electron transport rates in intact cells in response to 70.4 mM (4x)  $\text{NO}_2^-$ .

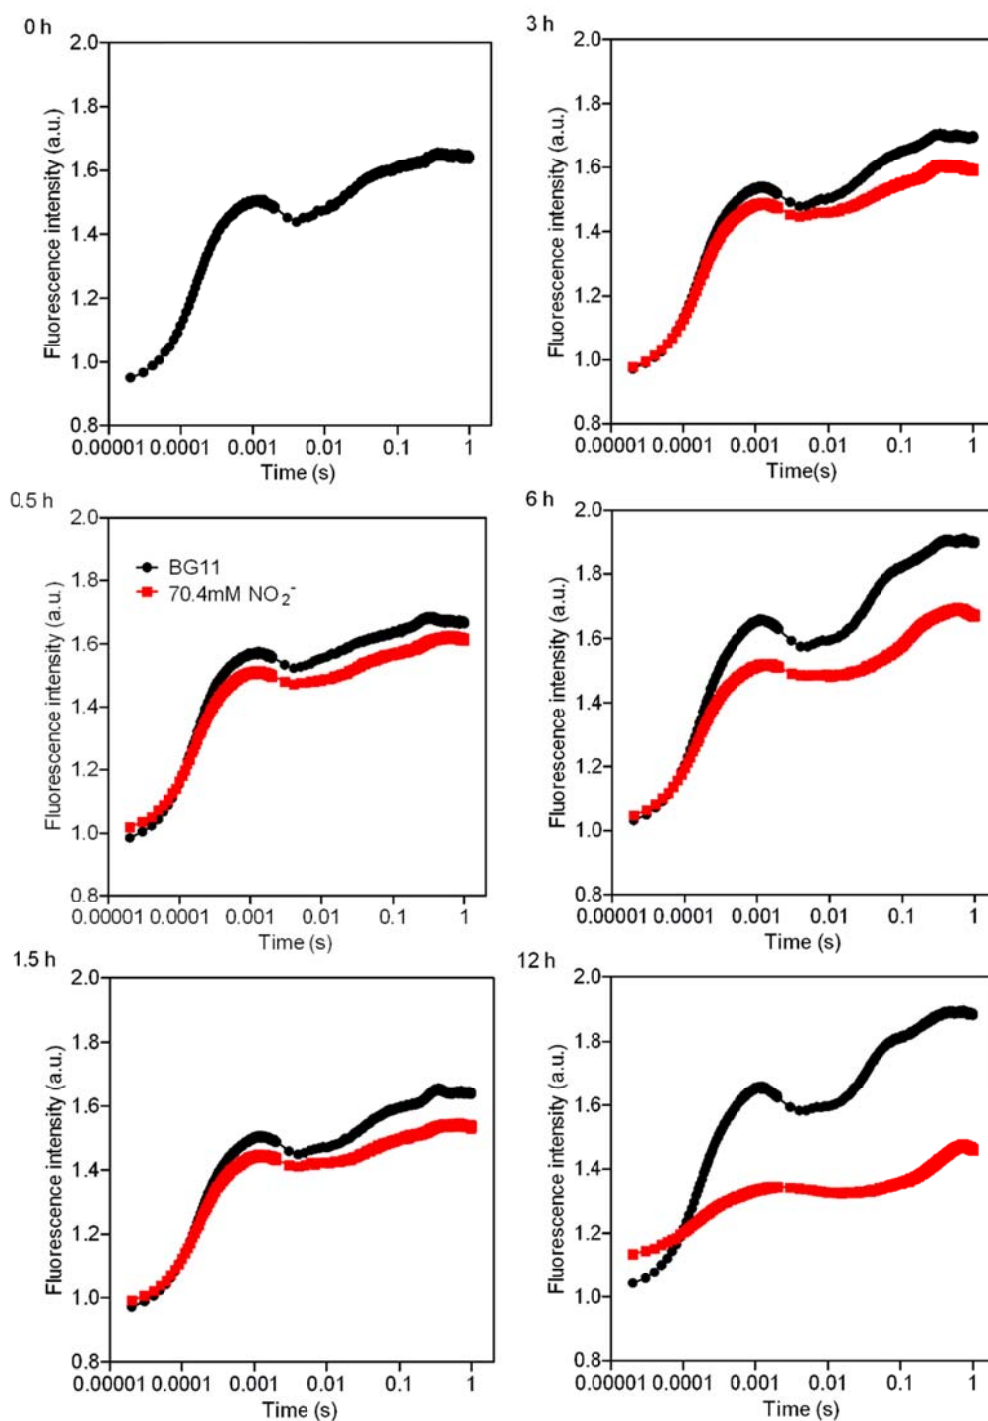

**Figure S3.** Polyphasic chlorophyll a fluorescence induction kinetics (FI) in *Synechocystis* cells exposed to 70.4mM (4×)  $\text{NO}_2^-$  for various periods of time. The FI transients of different samples plotted on a logarithmic time scale (0.01 ms to 1 s). Values are means of three measurements.

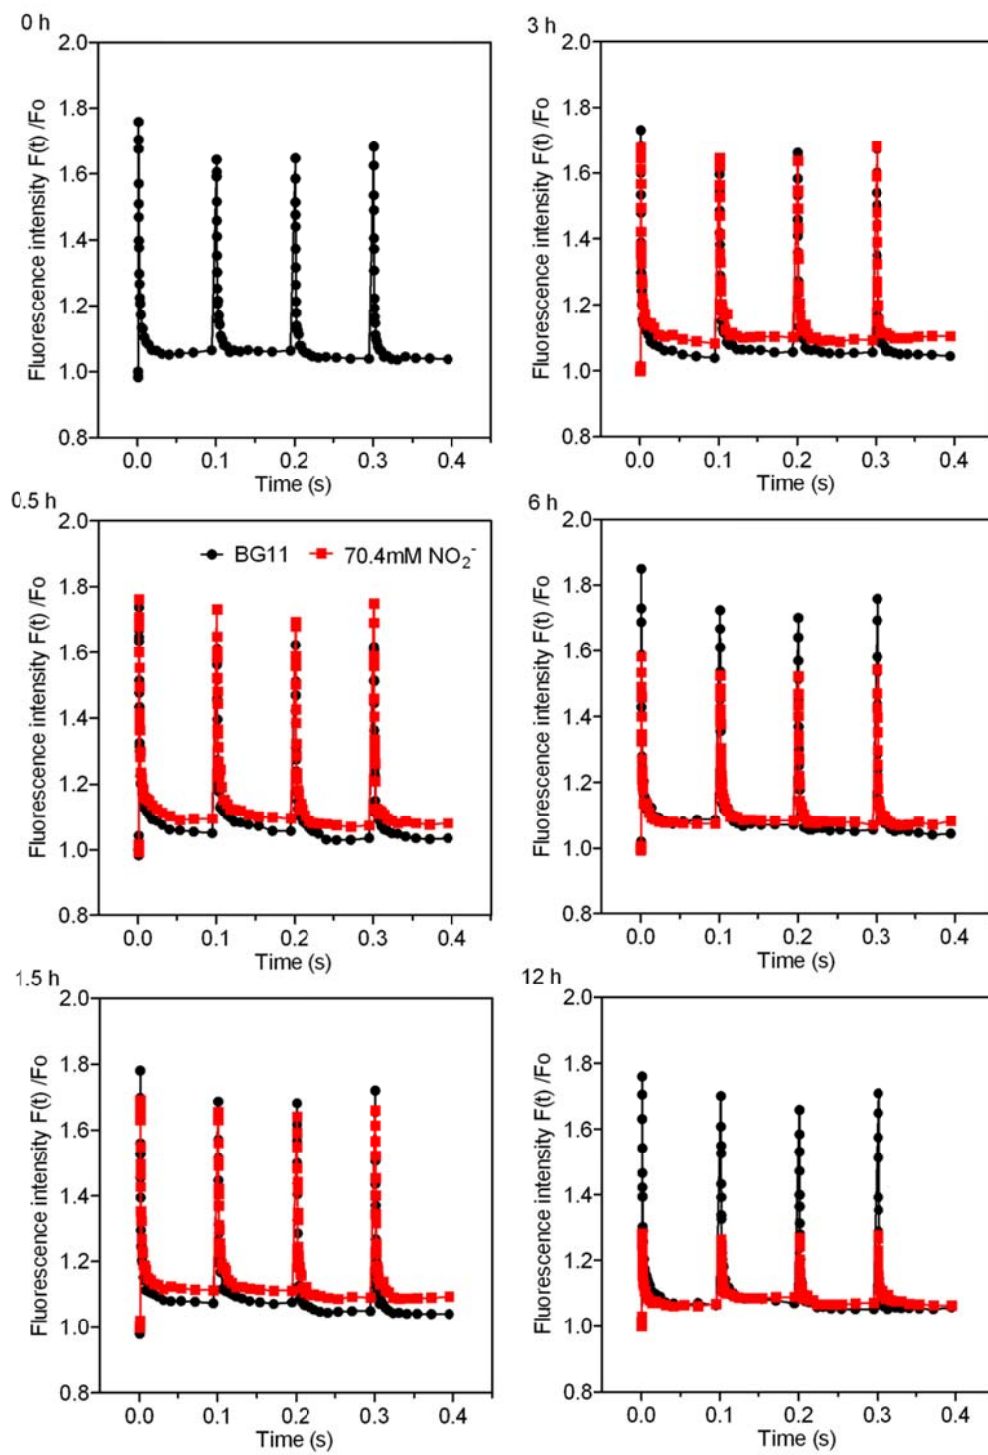

**Figure S4.** Fluorescence decay curves induced in *Synechocystis* treated with 70.4mM (4×)  $\text{NO}_2^-$  for various periods of time. Each value represents the mean of three replicates.
